# Supplementary material for: Novel Carboxypeptidase A6 (CPA6) Mutations Identified in Patients with Juvenile Myoclonic and Generalized Epilepsy
Source: PubMed Central journal article supplement (PMC4395397; doi:10.1371/journal.pone.0123180), 2015-04-13
Supplement: pone.0123180.s001.pdf [file pone.0123180.s001.pdf]

**Supplementary Table S1. Common CPA6 variants in JME patients.**

|                                               | Control n (%) | JME n (%)  |
|-----------------------------------------------|---------------|------------|
| <b>rs10957393 (c.133 T&gt;C, p.Phe45Leu)</b>  |               |            |
| <b>MAF: C=0.2322</b>                          |               |            |
| Allele                                        | 476           | 248        |
| T                                             | 394 (82.8)    | 206 (83.1) |
| C                                             | 82 (17.2)     | 42 (16.9)  |
| $p_u$                                         |               | 0.921      |
| Genotype                                      | 238           | 124        |
| TT                                            | 156 (65.5)    | 82 (66.1)  |
| CT                                            | 82 (34.5)     | 42 (33.9)  |
| CC                                            | 0 (0.0)       | 0 (0.0)    |
| $p_u$                                         |               | 0.912      |
| <b>rs17853192 (c.518 C&gt;G, p.Ser173Cys)</b> |               |            |
| <b>MAF: G = 0.0891</b>                        |               |            |
| Allele                                        | 474           | 243        |
| C                                             | 439 (92.6)    | 230 (93.5) |
| G                                             | 35 (7.4)      | 16 (6.5)   |
| $p_u$                                         |               | 0.661      |
| Genotype                                      | 237           | 123        |
| CC                                            | 202 (85.2)    | 107 (87.0) |
| CG                                            | 35 (14.8)     | 16 (13.0)  |
| GG                                            | 0 (0.0)       | 0 (0.0)    |
| $p_u$                                         |               | 0.999      |
| <b>rs17343819 (c.746 A&gt;G, p.Asn249Ser)</b> |               |            |
| <b>MAF: G = 0.0791</b>                        |               |            |
| Allele                                        | 476           | 248        |
| A                                             | 411 (86.3)    | 201 (83.0) |
| G                                             | 65 (13.7)     | 41 (17.0)  |
| $p_u$                                         |               | 0.245      |
| Genotype                                      | 238           | 121        |
| AA                                            | 176 (74.0)    | 82 (67.8)  |
| AG                                            | 59 (24.8)     | 37 (30.6)  |
| GG                                            | 3 (1.2)       | 2 (1.6)    |
| $p_u$                                         |               | 0.767      |

$p_u$  = uncorrected  $p$ -value

MAF = minor allele frequency (source: 1000 genomes, accessed Oct 2014)
